# Supplementary material for: Exploring the role of viologen and iodocuprate in the enhanced resistive switching performance of Anderson polyoxometalate-based three-component hybrids
Source: Royal Society of Chemistry journal article supplement (doi:10.1039/d4tc02172j), 2024-01-01
Supplement: d4tc02172j1.pdf [file d4tc02172j1.pdf]

## Supporting Information

### **Exploring the role of viologen and iodocuprate on enhanced resistive switching performance of Anderson polyoxometalate-based three-component hybrids**

Huai-Bin Chen,<sup>a</sup> Mei-Yun He,<sup>a</sup> Tao Li,<sup>a</sup> Chu-Chu Deng,<sup>a</sup> Hui-Ping Xiao,<sup>a</sup> Ming-Qiang Qi,<sup>b</sup> Xiang-Jian Kong,<sup>b</sup> Hao-Hong Li,<sup>a,\*</sup> Xin-Xiong Li<sup>a,\*</sup> and Shou-Tian Zheng<sup>a,\*</sup>

<sup>a</sup>Fujian Provincial Key Laboratory of Advanced Inorganic Oxygenated Materials, College of Chemistry, Fuzhou University, Fuzhou, Fujian, 350108, China.

<sup>b</sup>State Key Laboratory of Physical Chemistry of Solid Surface, College of Chemistry and Chemical Engineering, Xiamen University Xiamen, 361005, China.

Corresponding authors, E-mail address: lihh@fzu.edu.cn, lxx@@fzu.edu.cn, stzheng@fzu.edu.cn

#### **Contents**

**Section 1: Experimental section**

**Section 2: Additional table**

**Section 3: Additional structural figures and characterizations**

## Section 1: Experimental Section

**Materials and General methods:**  $(\text{TBA})_3\text{MnMo}_6\text{O}_{18}(\text{L})_2 \cdot 2\text{CH}_3\text{CN}$  precursor was prepared as described in the literature,<sup>1</sup> and 2-(Hydroxymethyl)-2-(pyridine-4-yl)-1,3-propanediol (**H<sub>3</sub>L**) was synthesized with literature method.<sup>2</sup> All other chemicals were commercially purchased and used without further purification. IR spectra were recorded on an Opus Vertex 70 FT-IR infrared spectrophotometer in the range of 400~4000  $\text{cm}^{-1}$ . Thermogravimetric analysis was performed on a Mettler Toledo TGA/SDTA 851e analyzer under an air-flow atmosphere with a heating rate of 10  $^{\circ}\text{C}/\text{min}$  in the temperature of 30~1000  $^{\circ}\text{C}$ . PXRD patterns were obtained by using a Ultima IV diffractometer with Cu-K $\alpha$  radiation ( $\lambda = 1.5418 \text{ \AA}$ ) in the range 5~45 $^{\circ}$ . UV-vis adsorption spectra were collected using a PerkinElmer Lambda 35 spectrophotometer to monitor the release process. Cyclic voltammetry (CV) was performed with a CHI660E electrochemical workstation by using of a conventional three-electrode cell. The HR-SEM images were taken on a Verios G4 field-emission scanning electron microscope. Electrical bistability measurement on ITO/POMOF/Ag device was executed on KEYSIGHT B2911A single channel digital source meter. Single-crystal X-ray diffraction data for **1**, **2** and **3** were collected on a Bruker APEX II diffractometer at 175 K equipped with a fine focus, 2.0 kW sealed tube X-ray source (MoK radiation,  $\lambda = 0.71073 \text{ \AA}$ ) operating at 50 kV and 30 mA.

### Synthesis

**$(\text{MV})_3(\text{MnMo}_6\text{O}_{18}\text{L}_2)_2 \cdot 4\text{DMF}$  (1):** A mixture of  $(\text{TBA})_3[\text{MnMo}_6\text{O}_{18}\text{L}_2] \cdot 2\text{CH}_3\text{CN}$  (0.274 g, 0.20 mmol),  $\text{MV} \cdot \text{Cl}_2$  (0.0127 g, 0.0697 mmol) were mixed in 4 mL DMF. After stirring for 1 hour, the resultant mixture was sealed in a glass vial (20 mL) and heated at 90  $^{\circ}\text{C}$  for 3 days. After cooling to room temperature slowly, orange block crystals were obtained. Yield: about 24 mg (30% based on Mn). IR (solid ATR,  $\nu/\text{cm}^{-1}$ ): 3051 (w), 1637 (m), 1596 (m), 1052 (s), 904 (vs), 638 (vs), 565 (w).

**$(\text{MV})_2[\text{Cu}(\text{DMF})_2](\text{MnMo}_6\text{O}_{18}\text{L}_2)_2 \cdot 6\text{DMF}$  (2):** **2** was synthesized using the same process to that of **1**, except  $\text{CuI}$  (0.0358 g, 0.1880 mmol) was used as additional starting material. Transparent block crystals can be obtained (yield: 10.2 mg, 30% based on Mn). IR (solid ATR,  $\nu/\text{cm}^{-1}$ ): 3051 (w), 2930 (w), 1643 (s), 1423 (m), 1324 (s), 1056 (s), 910 (s), 655 (s), 555 (m).

**$(\text{MV})_2(\text{Cu}_2\text{I}_3)(\text{MnMo}_6\text{O}_{18}\text{L}_2) \cdot 4\text{CH}_3\text{CN}$  (3):** **3** was prepared under the same conditions with that of **2**, except that acetonitrile (4 mL) was used as solvent instead of DMF. Brown block crystals with yield of 30% (based on Mn, 26.7 mg) can be obtained. IR (solid ATR,  $\nu/\text{cm}^{-1}$ ): 3356 (w), 3046 (w),

2958 (w), 2923 (w), 1637 (vs), 1559 (s), 1494 (s), 1430 (s), 1324 (s), 1268 (s), 1187 (m), 1055 (s), 917(s), 815 (s), 655 (s), 558 (m).

### **X-ray single crystal diffraction**

X-ray diffraction data was collected on a Bruker APEX II CCD area diffractometer equipped with a fine focus, 2.0 kW sealed tube X-ray source (Mo K $\alpha$  radiation,  $\lambda = 0.71073$  Å) at 175(2) K. During the data reduction, multi-scan absorption correction (SADABS) including corrections for Lorentz and polarization effects has applied. Crystal structure was solved by the direct method with program SHELXS and refined with the least-squares program SHELXL.<sup>3</sup> The structures were verified by the ADDSYM algorithm in the PLATON program.<sup>4</sup> The refinement details are summarized in Table S1, selected bond lengths and angles are listed in Table S2, hydrogen bond details are given in Table S3-6. CCDC 2233694-2233696 contains the supplementary crystallographic data for this paper. This data can be obtained free of charge from the Cambridge Crystallographic Data Centre via [www.ccdc.cam.ac.uk/data\\_request/cif](http://www.ccdc.cam.ac.uk/data_request/cif).

### **Device Fabrication**

The memory devices with the structures of ITO/active layer/Ag have been fabricated according to previous literature.<sup>5</sup> ITO-coated glass substrate was sequentially cleaned by ultrasonic in acetone, ethanol and deionized water for 20 min, and dried in an oven for 15 min at 110 °C. Afterward, 5 mg as-synthesized Anderson-based hybrids hybrids or their precursors (methyl viologen (MV<sup>2+</sup>), CuI, (MnMo<sub>6</sub>O<sub>18</sub>L<sub>2</sub>)) were dissolved in 5 mL DMF (concentration: 1 mg/mL). Then 100  $\mu$ L as-prepared suspension was spin-coated onto ITO substrate. During the spin-coated process, the speed was controlled as follows: 300 rpm for 10 s firstly, and then 2500 rpm for another 40 s. Ag pastes were deposited as the top electrodes through a shadow mask (500  $\mu$ m width) with circular holes with a diameter about 0.1 cm. Finally, the device was dried at 60 °C for 30 minutes to improve the adhesion.

## Section 2: Additional table

Table S1 X-ray crystallographic data in this work

|                                                                        | 1                                                                                                 | 2                                                                                                 | 3                                                                                                                | 3-heated                                                                                                        |
|------------------------------------------------------------------------|---------------------------------------------------------------------------------------------------|---------------------------------------------------------------------------------------------------|------------------------------------------------------------------------------------------------------------------|-----------------------------------------------------------------------------------------------------------------|
| Empirical formula                                                      | C <sub>84</sub> H <sub>110</sub> Mn <sub>2</sub> Mo <sub>12</sub> N <sub>14</sub> O <sub>52</sub> | C <sub>41</sub> H <sub>51</sub> CuMn <sub>2</sub> Mo <sub>12</sub> N <sub>6</sub> O <sub>50</sub> | C <sub>48</sub> H <sub>57</sub> Cu <sub>2</sub> I <sub>3</sub> MnMo <sub>6</sub> N <sub>10</sub> O <sub>24</sub> | C <sub>42</sub> H <sub>48</sub> Cu <sub>2</sub> I <sub>3</sub> MnMo <sub>6</sub> N <sub>6</sub> O <sub>24</sub> |
| Formula weight                                                         | 3409.02                                                                                           | 3868.06                                                                                           | 2296.42                                                                                                          | 2159.22                                                                                                         |
| Crystal system                                                         | Monoclinic                                                                                        | Triclinic                                                                                         | Triclinic                                                                                                        | Triclinic                                                                                                       |
| Space group                                                            | <i>P2<sub>1</sub>/n</i>                                                                           | <i>P-1</i>                                                                                        | <i>P-1</i>                                                                                                       | <i>P-1</i>                                                                                                      |
| <i>a</i> (Å)                                                           | 22.8412(12)                                                                                       | 18.6013(14)                                                                                       | 13.4196(16)                                                                                                      | 13.6009(13)                                                                                                     |
| <i>b</i> (Å)                                                           | 13.7093(7)                                                                                        | 18.6693(15)                                                                                       | 13.6602(16)                                                                                                      | 13.6289(13)                                                                                                     |
| <i>c</i> (Å)                                                           | 35.3091(16)                                                                                       | 23.668(2)                                                                                         | 19.687(2)                                                                                                        | 19.6868(19)                                                                                                     |
| $\alpha$ (°)                                                           | 90                                                                                                | 75.297(3)                                                                                         | 72.664(2)                                                                                                        | 79.229(2)                                                                                                       |
| $\beta$ (°)                                                            | 97.084(2)                                                                                         | 85.771(3)                                                                                         | 79.244(2)                                                                                                        | 72.871(2)                                                                                                       |
| $\gamma$ (°)                                                           | 90                                                                                                | 82.235(3)                                                                                         | 80.619(2)                                                                                                        | 80.347(2)                                                                                                       |
| <i>V</i> (Å <sup>3</sup> )                                             | 10972.2(9)                                                                                        | 7870.5(11)                                                                                        | 3362.2(7)                                                                                                        | 3401.2(6)                                                                                                       |
| <i>Z</i>                                                               | 4                                                                                                 | 2                                                                                                 | 2                                                                                                                | 2                                                                                                               |
| <i>F</i> (000)                                                         | 6728                                                                                              | 3856                                                                                              | 2202                                                                                                             | 2056                                                                                                            |
| $\rho_{calcd}$ (g/cm <sup>3</sup> )                                    | 2.064                                                                                             | 1.632                                                                                             | 2.268                                                                                                            | 2.108                                                                                                           |
| Temperature (K)                                                        | 175(2)                                                                                            | 175(2)                                                                                            | 175(2)                                                                                                           | 175(2)                                                                                                          |
| $\mu$ (mm <sup>-1</sup> )                                              | 1.642                                                                                             | 1.290                                                                                             | 3.339                                                                                                            | 3.292                                                                                                           |
| Ref. Collected                                                         | 193950                                                                                            | 304687                                                                                            | 20631                                                                                                            | 20584                                                                                                           |
| Independent refl.                                                      | 19417                                                                                             | 27982                                                                                             | 11410                                                                                                            | 11785                                                                                                           |
| Parameters                                                             | 1500                                                                                              | 1742                                                                                              | 871                                                                                                              | 764                                                                                                             |
| GOF on <i>F</i> <sup>2</sup>                                           | 1.038                                                                                             | 1.050                                                                                             | 0.999                                                                                                            | 1.021                                                                                                           |
| Final <i>R</i> indices ( <i>I</i> =<br><i>2</i> $\sigma$ ( <i>I</i> )) | <i>R</i> <sub><i>I</i></sub> =0.0333,<br><i>wR</i> <sub>2</sub> =0.0765                           | <i>R</i> <sub>1</sub> =0.0738,<br><i>wR</i> <sub>2</sub> =0.1964                                  | <i>R</i> <sub>1</sub> =0.0534,<br><i>wR</i> <sub>2</sub> =0.0938                                                 | <i>R</i> <sub>1</sub> =0.0441,<br><i>wR</i> <sub>2</sub> =0.0724                                                |
| <i>R</i> indices (all data)                                            | <i>R</i> <sub><i>I</i></sub> =0.0368,<br><i>wR</i> <sub>2</sub> =0.0784                           | <i>R</i> <sub>1</sub> = 0.0972,<br><i>wR</i> <sub>2</sub> = 0.2108                                | <i>R</i> <sub>1</sub> =0.1118,<br><i>wR</i> <sub>2</sub> =0.1116                                                 | <i>R</i> <sub>1</sub> =0.0992,<br><i>wR</i> <sub>2</sub> =0.1121                                                |

Table S2 Mn-O bonds in this work (Å)

| 1           | Distance | 2           | Distance | 3             | Distance | 3-heated      | Distance |
|-------------|----------|-------------|----------|---------------|----------|---------------|----------|
| Mn(1)-O(24) | 1.907(3) | Mn(1)-O(19) | 2.045(9) | Mn(1)-O(11)#1 | 1.890(6) | Mn(1)-O(10)   | 2.013(4) |
| Mn(1)-O(19) | 1.917(3) | Mn(1)-O(20) | 1.923(6) | Mn(1)-O(11)   | 1.890(6) | Mn(1)-O(10)#1 | 2.013(4) |
| Mn(1)-O(21) | 1.921(3) | Mn(1)-O(21) | 1.955(7) | Mn(1)-O(10)#1 | 1.982(6) | Mn(1)-O(11)   | 1.969(5) |
| Mn(1)-O(22) | 1.927(3) | Mn(1)-O(22) | 2.048(7) | Mn(1)-O(10)   | 1.982(6) | Mn(1)-O(11)#1 | 1.969(5) |
| Mn(1)-O(20) | 2.119(3) | Mn(1)-O(23) | 1.932(6) | Mn(1)-O(12)#1 | 2.090(6) | Mn(1)-O(12)   | 1.959(4) |
| Mn(1)-O(23) | 2.122(3) | Mn(1)-O(24) | 1.967(7) | Mn(1)-O(12)   | 2.090(6) | Mn(1)-O(12)#1 | 1.959(4) |
| Mn(2)-O(43) | 1.920(3) | Mn(2)-O(43) | 1.917(6) | Mn(2)-O(24)   | 1.973(6) | Mn(2)-O(22)   | 2.080(5) |
| Mn(2)-O(47) | 1.930(3) | Mn(2)-O(44) | 2.086(7) | Mn(2)-O(24)#2 | 1.973(6) | Mn(2)-O(22)#2 | 2.080(5) |
| Mn(2)-O(46) | 1.930(3) | Mn(2)-O(45) | 1.929(7) | Mn(2)-O(23)   | 1.978(7) | Mn(2)-O(23)   | 1.983(5) |
| Mn(2)-O(44) | 1.934(3) | Mn(2)-O(46) | 1.929(7) | Mn(2)-O(23)#2 | 1.978(7) | Mn(2)-O(23)#2 | 1.983(5) |
| Mn(2)-O(48) | 2.093(3) | Mn(2)-O(47) | 2.100(7) | Mn(2)-O(22)   | 1.987(6) | Mn(2)-O(24)#2 | 1.897(4) |
| Mn(2)-O(45) | 2.104(3) | Mn(2)-O(48) | 1.928(7) | Mn(2)-O(22)#2 | 1.987(6) | Mn(2)-O(24)   | 1.897(4) |

Symmetry codes for **3**: #1 -x+2,-y,-z+1; #2 -x,-y+2,-z

**Table S3 Hydrogen Bonds for 1**

| D-H...A              | D-H/Å | H...A/ Å | D-A/Å     | $\angle(\text{D-H}\cdots\text{A})^\circ$ | Symmetry code      |
|----------------------|-------|----------|-----------|------------------------------------------|--------------------|
| C(37)-H(37B)···O(49) | 0.96  | 2.38     | 3.3140(2) | 164                                      |                    |
| C(37)-H(37C)···O(1)  | 0.96  | 2.33     | 3.1126(2) | 138                                      | 1/2-x,-1/2+y,1/2-z |
| C(42)-H(42)···O(35)  | 0.93  | 2.26     | 2.9614(2) | 132                                      |                    |
| C(44)-H(44)···O(5)   | 0.93  | 2.18     | 3.0779(2) | 161                                      | 1/2-x,-1/2+y,1/2-z |
| C(45)-H(45)···O(52)  | 0.93  | 2.51     | 3.3645(2) | 152                                      | 1/2-x,-1/2+y,1/2-z |
| C(46)-H(46)···O(50)  | 0.93  | 2.33     | 3.1685(2) | 150                                      | 1/2-x,-1/2+y,1/2-z |
| C(47)-H(47)···O(49)  | 0.93  | 2.39     | 3.2784(2) | 161                                      | 1/2-x,-1/2+y,1/2-z |
| C(48)-H(48C)···O(52) | 0.96  | 2.57     | 3.3815(2) | 142                                      | 1/2-x,-1/2+y,1/2-z |
| C(49)-H(49B)···O(16) | 0.96  | 2.41     | 3.1872(2) | 137                                      | 1-x,1-y,1-z        |
| C(49)-H(49C)···O(17) | 0.96  | 2.44     | 3.1223(2) | 128                                      |                    |
| C(50)-H(50)···O(37)  | 0.93  | 2.53     | 3.3048(2) | 141                                      | 1/2-x,1/2+y,1/2-z  |
| C(51)-H(51)···O(50)  | 0.93  | 2.56     | 3.4145(2) | 153                                      | 1/2-x,-1/2+y,1/2-z |
| C(54)-H(54)···O(18)  | 0.93  | 2.21     | 3.0606(2) | 152                                      | 1-x,1-y,1-z        |
| C(56)-H(56)···O(40)  | 0.93  | 2.43     | 3.0560(2) | 125                                      | 1/2-x,1/2+y,1/2-z  |
| C(57)-H(57)···O(29)  | 0.93  | 2.44     | 3.3081(2) | 156                                      | 1/2-x,-1/2+y,1/2-z |
| C(58)-H(58)···O(13)  | 0.93  | 2.38     | 3.2462(2) | 155                                      | 1-x,-y,1-z         |
| C(58)-H(58)···O(14)  | 0.93  | 2.48     | 3.1910(2) | 133                                      | 1-x,-y,1-z         |
| C(60)-H(60A)···O(14) | 0.96  | 2.26     | 3.1581(2) | 156                                      | 1-x,-y,1-z         |
| C(60)-H(60B)···O(27) | 0.96  | 2.23     | 3.0997(2) | 150                                      | 1/2-x,-1/2+y,1/2-z |
| C(61)-H(61)···O(30)  | 0.93  | 2.5      | 2.8556(2) | 103                                      |                    |
| C(62)-H(62)···O(26)  | 0.93  | 2.33     | 3.2330(2) | 165                                      | 1-x,-y,-z          |
| C(64)-H(64)···O(11)  | 0.93  | 2.48     | 3.1653(2) | 130                                      |                    |
| C(65)-H(65)···O(9)   | 0.93  | 2.44     | 3.2101(2) | 141                                      |                    |
| C(67)-H(67)···O(25)  | 0.93  | 2.31     | 3.0320(2) | 134                                      | 1-x,-y,1-z         |
| C(69)-H(69)···O(6)   | 0.93  | 2.32     | 3.1333(2) | 147                                      | x,-1+y,z           |
| C(70)-H(70)···O(4)   | 0.93  | 2.51     | 3.2240(2) | 133                                      | x,-1+y,z           |
| C(71)-H(71C)···O(12) | 0.96  | 2.43     | 3.1811(2) | 135                                      | 3/2-x,-1/2+y,1/2-z |
| C(74)-H(74)···O(29)  | 0.93  | 2.56     | 3.3386(2) | 141                                      |                    |
| C(76)-H(76C)···O(32) | 0.96  | 2.43     | 3.3381(2) | 158                                      | 3/2-x,-1/2+y,1/2-z |
| C(81)-H(81)···O(8)   | 0.93  | 2.48     | 3.3099(2) | 148                                      |                    |
| C(82)-H(82A)···O(8)  | 0.96  | 2.52     | 3.3632(2) | 147                                      |                    |
| C(83)-H(83A)···O(13) | 0.96  | 2.49     | 3.3218(2) | 145                                      | 3/2-x,1/2+y,1/2-z  |

**Table S4 Hydrogen Bonds for 2**

| D-H...A              | D-H/Å | H...A/ Å | D-A/Å     | $\angle(\text{D-H}\cdots\text{A})^\circ$ | Symmetry code |
|----------------------|-------|----------|-----------|------------------------------------------|---------------|
| C(42)-H(42A)···O(17) | 0.96  | 2.45     | 3.3973(3) | 170                                      | x,1+y,-1+z    |
| C(42)-H(42B)···O(17) | 0.96  | 2.45     | 3.3485(3) | 156                                      | 1-x,1-y,1-z   |
| C(43)-H(43)···O(14)  | 0.93  | 2.4      | 3.1633(3) | 139                                      | x,1+y,-1+z    |
| C(43)-H(43)···O(15)  | 0.93  | 2.56     | 3.2369(3) | 130                                      | x,1+y,-1+z    |
| C(44)-H(44)···O(52)  | 0.93  | 2.33     | 3.2463(3) | 170                                      | 1-x,1-y,-z    |
| C(46)-H(46)···O(1)   | 0.93  | 2.55     | 3.1777(3) | 125                                      | 1-x,1-y,1-z   |
| C(47)-H(47)···O(17)  | 0.93  | 2.34     | 3.1897(3) | 152                                      | 1-x,1-y,1-z   |

|                      |      |      |           |     |             |
|----------------------|------|------|-----------|-----|-------------|
| C(51)-H(51)···O(53)  | 0.93 | 2.28 | 3.1163(3) | 150 |             |
| C(53)-H(53A)···O(34) | 0.96 | 2.34 | 3.2762(3) | 164 | -x,1-y,1-z  |
| C(58)-H(58)···O(2)   | 0.93 | 2.49 | 3.3616(3) | 156 |             |
| C(58)-H(58)···O(4)   | 0.93 | 2.56 | 3.1191(3) | 119 |             |
| C(62)-H(62)···O(28)  | 0.93 | 2.35 | 3.0881(3) | 137 | -x,1-y,1-z  |
| C(63)-H(63A)···O(56) | 0.96 | 2.5  | 3.0884(3) | 120 |             |
| C(64)-H(64)···O(57)  | 0.93 | 2.28 | 3.0234(3) | 136 |             |
| C(66)-H(66A)···O(40) | 0.96 | 2.47 | 3.4022(3) | 164 | -x,1-y,1-z  |
| C(70)-H(70A)···O(60) | 0.96 | 2.54 | 3.2251(3) | 128 | -1+x,y,1+z  |
| C(71)-H(71)···O(25)  | 0.93 | 2.6  | 3.5285(3) | 177 |             |
| C(74)-H(74)···O(39)  | 0.93 | 2.5  | 3.4088(3) | 166 | x,1+y,-1+z  |
| C(76)-H(76B)···O(37) | 0.96 | 2.56 | 3.4700(3) | 157 | x,1+y,-1+z  |
| C(77)-H(77)···O(14)  | 0.93 | 2.4  | 3.1612(3) | 139 |             |
| C(78)-H(78B)···O(58) | 0.96 | 2.56 | 3.4557(3) | 155 |             |
| C(83)-H(83)···O(31)  | 0.93 | 2.4  | 3.2936(3) | 162 | -x,1-y,1-z  |
| C(86)-H(86)···O(4)   | 0.93 | 2.56 | 3.3764(3) | 147 |             |
| C(86)-H(86)···O(6)   | 0.93 | 2.54 | 3.3329(3) | 144 |             |
| C(88)-H(88C)···O(25) | 0.96 | 2.51 | 3.2654(3) | 136 | 1-x,1-y,1-z |
| C(90)-H(90B)···O(36) | 0.96 | 2.59 | 3.4675(3) | 152 | -x,1-y,1-z  |
| C(92)-H(92)···O(54)  | 0.93 | 2.47 | 3.3777(3) | 166 | 1-x,1-y,-z  |

**Table S5 Hydrogen Bonds for 3**

| D-H...A              | D-H/Å | H...A/ Å | D-A/Å     | ∠(D-H...A)/° | Symmetry code |
|----------------------|-------|----------|-----------|--------------|---------------|
| C(24)-H(24)···O(14)  | 1.09  | 2.52     | 3.1064(4) | 113          | -x,2-y,1-z    |
| C(24)-H(24)···O(16)  | 1.09  | 2.19     | 3.1799(4) | 150          | -x,2-y,1-z    |
| C(27)-H(27)···N(8)   | 1.13  | 2.19     | 3.2355(4) | 153          |               |
| C(31)-H(31A)···I(1)  | 0.96  | 3.01     | 3.8732(5) | 151          | 1-x,1-y,1-z   |
| C(31)-H(31B)···O(14) | 0.96  | 2.47     | 3.3290(4) | 149          | -x,2-y,1-z    |
| C(32)-H(32)···O(6)   | 0.93  | 2.5      | 2.9000(3) | 106          | -1+x,1+y,z    |
| C(32)-H(32)···I(1)   | 0.93  | 2.96     | 3.7020(4) | 138          | 1-x,1-y,1-z   |
| C(35)-H(35)···N(7)   | 0.93  | 2.57     | 3.1167(4) | 118          | -1+x,1+y,z    |
| C(36)-H(36)···O(14)  | 0.93  | 2.31     | 3.1784(4) | 155          | -x,2-y,1-z    |
| C(37)-H(37A)···O(3)  | 0.96  | 2.42     | 3.2960(4) | 151          | -1+x,1+y,z    |
| C(37)-H(37B)···O(5)  | 0.96  | 2.37     | 3.3224(4) | 174          | -x,2-y,1-z    |
| C(38)-H(38)···O(4)   | 0.93  | 2.41     | 3.2470(4) | 150          | -x,2-y,1-z    |
| C(41)-H(41)···N(10)  | 0.93  | 2.46     | 3.2366(4) | 141          |               |
| C(43)-H(43A)···O(5)  | 0.96  | 2.58     | 3.4867(4) | 157          | -1+x,1+y,z    |
| C(45)-H(45A)···I(3)  | 0.96  | 3.03     | 3.8173(5) | 140          | 1-x,-y,1-z    |
| C(45)-H(45B)···O(19) | 0.96  | 2.46     | 3.3127(4) | 148          | -x,1-y,1-z    |
| C(47)-H(47A)···O(2)  | 0.96  | 2.5      | 3.4104(4) | 158          | -x,2-y,1-z    |
| C(47)-H(47B)···O(15) | 0.96  | 2.21     | 3.0909(4) | 151          | 1-x,1-y,1-z   |

**Table S6 Hydrogen Bonds for 3 after heating**

| D-H...A            | D-H/Å | H...A/ Å | D-A/Å     | ∠(D-H...A)/° | Symmetry code |
|--------------------|-------|----------|-----------|--------------|---------------|
| C(26)-H(26)···O(1) | 0.93  | 2.53     | 3.1061(3) | 121          |               |
| C(26)-H(26)···O(8) | 0.93  | 2.36     | 3.1606(3) | 144          |               |

|                      |      |      |           |     |             |
|----------------------|------|------|-----------|-----|-------------|
| C(30)-H(30A)···O(14) | 0.96 | 2.54 | 3.1868(3) | 125 | 1-x,2-y,-z  |
| C(30)-H(30C)···O(1)  | 0.96 | 2.45 | 3.3089(3) | 148 | 1-x,1-y,1-z |
| C(31)-H(31)···O(1)   | 0.93 | 2.32 | 3.1956(3) | 156 | 1-x,1-y,1-  |
| C(35)-H(35)···I(2)   | 0.93 | 2.97 | 3.7369(4) | 141 |             |
| C(35)-H(35)···O(21)  | 0.93 | 2.51 | 2.8789(3) | 104 | 1-x,2-y,-z  |
| C(36)-H(36A)···O(20) | 0.96 | 2.59 | 3.4400(3) | 147 | 1-x,1-y,-z  |
| C(36)-H(36B)···O(20) | 0.96 | 2.52 | 3.3590(3) | 145 | 1+x,y,z     |
| C(41)-H(41)···O(19)  | 0.93 | 2.47 | 3.3222(3) | 152 | 1+x,y,z     |

**Table S7 RS parameters of memory devices in this work**

| Devices                                                  | $V_{Set}/V$ | $V_{Reset}/V$ | $I_{ON}/A$            | $I_{OFF}/A$           | ON/ OFF ratio      |
|----------------------------------------------------------|-------------|---------------|-----------------------|-----------------------|--------------------|
| ITO/MV·2I/Ag                                             | 2.14        | -3.04         | $1.58 \times 10^{-4}$ | $1.33 \times 10^{-4}$ | 1.19               |
| ITO/CuI/Ag                                               | 0.28        | -1.98         | $1.48 \times 10^{-4}$ | $1.17 \times 10^{-4}$ | 1.26               |
| ITO/MnMo <sub>6</sub> O <sub>18</sub> L <sub>2</sub> /Ag | 0.42        | -2.33         | $1.51 \times 10^{-4}$ | $1.89 \times 10^{-5}$ | 7.99               |
| ITO/I/Ag                                                 | 1.39        | -2.53         | $1.84 \times 10^{-4}$ | $1.55 \times 10^{-5}$ | 12.88              |
| ITO/2/Ag                                                 | 1.42        | -3.56         | $1.98 \times 10^{-4}$ | $2.87 \times 10^{-6}$ | 64.69              |
| ITO/3/Ag                                                 | 0.97        | -3.49         | $1.17 \times 10^{-4}$ | $5.01 \times 10^{-7}$ | $2.32 \times 10^2$ |
| ITO/3/Ag after 11 months                                 | 0.92        | -3.45         | $1.77 \times 10^{-4}$ | $5.97 \times 10^{-7}$ | $2.96 \times 10^2$ |
| ITO/3/Ag at 240°C                                        | 0.96        | 3.50          | $2.52 \times 10^{-4}$ | $4.06 \times 10^{-7}$ | $6.21 \times 10^2$ |

**Table S8 The comparison with relative POM-based memristors**

| Devices structure                                                                                                                                                                                                                                                 | ON/OFF ratio       | $V_{Set}/V_{Reset}/V$ | Endurance | Retention(s) | Ref.      |
|-------------------------------------------------------------------------------------------------------------------------------------------------------------------------------------------------------------------------------------------------------------------|--------------------|-----------------------|-----------|--------------|-----------|
| ITO/ Na <sub>6</sub> V <sub>10</sub> O <sub>28</sub> /Cr/Au                                                                                                                                                                                                       | 25                 | 1.2/0.8               | 200       | 2200         | 6         |
| ITO/H <sub>3</sub> PW <sub>12</sub> O <sub>40</sub> @PMMA/Au                                                                                                                                                                                                      | $6 \times 10^2$    | 1.2/-1.71             | 100       | $10^4$       | 7         |
| ITO/PMMA- MAPOM/Pt                                                                                                                                                                                                                                                | 4~5                | 1.0/1.5/-1.35         | 50        | $10^4$       | 8         |
| ITO/[Co(H <sub>2</sub> O) <sub>6</sub> ] <sub>2</sub> [Co <sub>3</sub> (bpdo) <sub>4</sub> (H <sub>2</sub> O) <sub>10</sub> ][Co <sub>4</sub> (H <sub>2</sub> O) <sub>2</sub> (B-a-PW <sub>9</sub> O <sub>34</sub> ) <sub>2</sub> ]·2 bpdo·14H <sub>2</sub> O /Ag | 55.5               | -0.63/0.75            | 20        | -            | 9         |
| ITO/{[Co <sub>2</sub> (bpdo) <sub>4</sub> (H <sub>2</sub> O) <sub>6</sub> ](α-GeW <sub>12</sub> O <sub>40</sub> )}·4(H <sub>2</sub> O) <sub>n</sub> /Ag                                                                                                           | $1.0 \times 10^2$  | 1.77/-3.42            | 100       | -            | 5         |
| ITO/(MV) <sub>3</sub> (MnMo <sub>6</sub> O <sub>18</sub> L <sub>2</sub> ) <sub>2</sub> ·4DMF /Ag                                                                                                                                                                  | 12.88              | 1.39/-2.53            | 20        | -            | this work |
| ITO/(MV) <sub>2</sub> [Cu(DMF) <sub>2</sub> ](MnMo <sub>6</sub> O <sub>18</sub> L <sub>1</sub> ) <sub>2</sub> ·6DMF/Ag                                                                                                                                            | 64.69              | 1.42/-3.56            | 84        | -            | this work |
| ITO/(MV) <sub>2</sub> [Cu <sub>2</sub> I <sub>3</sub> ](MnMo <sub>6</sub> O <sub>18</sub> L <sub>2</sub> )·4CH <sub>3</sub> CN /Ag                                                                                                                                | $2.32 \times 10^2$ | 0.97/-3.49            | 700       | $10^4$       | this work |

### Section 3: Additional structural figures and characterizations

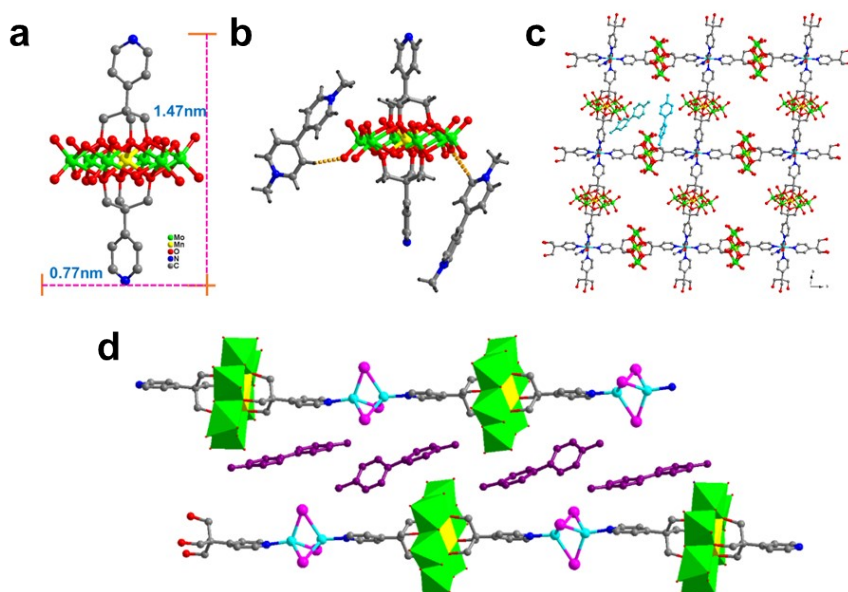

**Fig. S1** (a) The structure of  $(\text{MnMo}_6\text{O}_{18}\text{L}_2)^{3-}$  unit; (b) hydrogen bonds between  $(\text{MnMo}_6\text{O}_{18}\text{L}_2)^{3-}$  and  $\text{MV}^{2+}$  cations in **1**; (c) 2D layer of **2** showing the position of  $\text{MV}^{2+}$ ; (d) the encapsulation of  $\text{MV}^{2+}$  into the 1D  $[(\text{Cu}_2\text{I}_3)(\text{MnMo}_6\text{O}_{18}\text{L}_2)]_n^{2n-}$  chains.

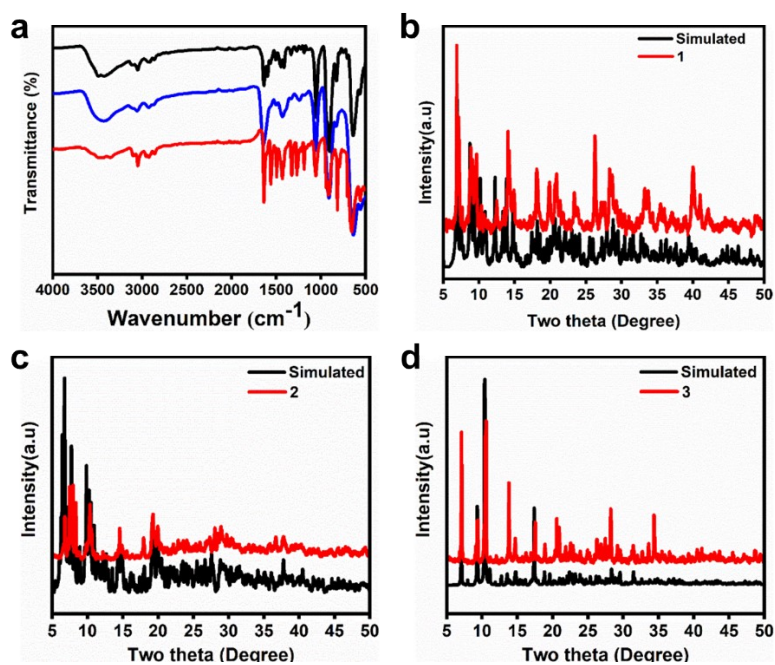

**Fig. S2** (a) IR spectra of three hybrids; Simulated and experiment PXRD patterns: (b) **1**; (c) **2**; (d) **3**.



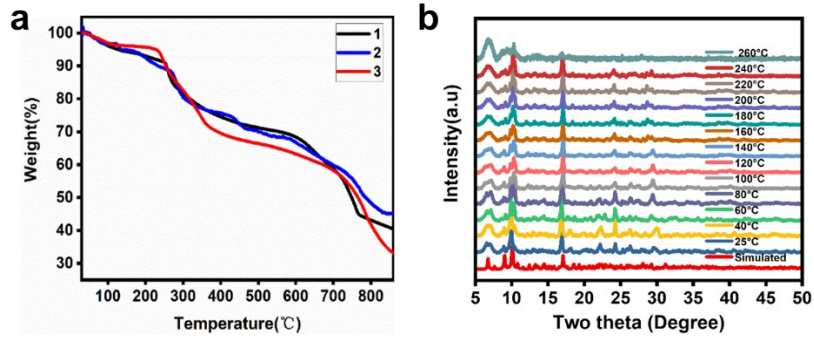

Fig. S3 (a) TG curves of 1, 2 and 3; (b) simulated and temperature-dependent PXRD patterns of 3.

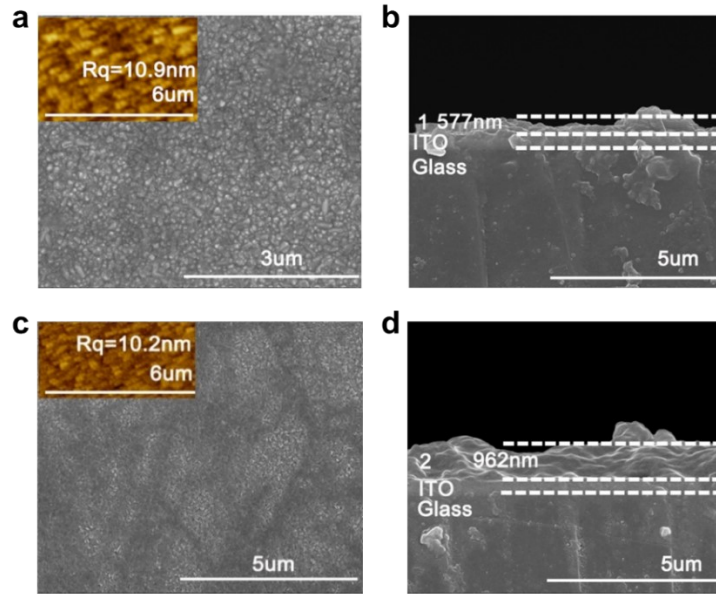

Fig. S4 The top-view (inserted: the surface AFM image) and the cross-sectional SEM images showing the thickness: (a, b) ITO/1/Ag; (c, d) ITO/2/Ag.

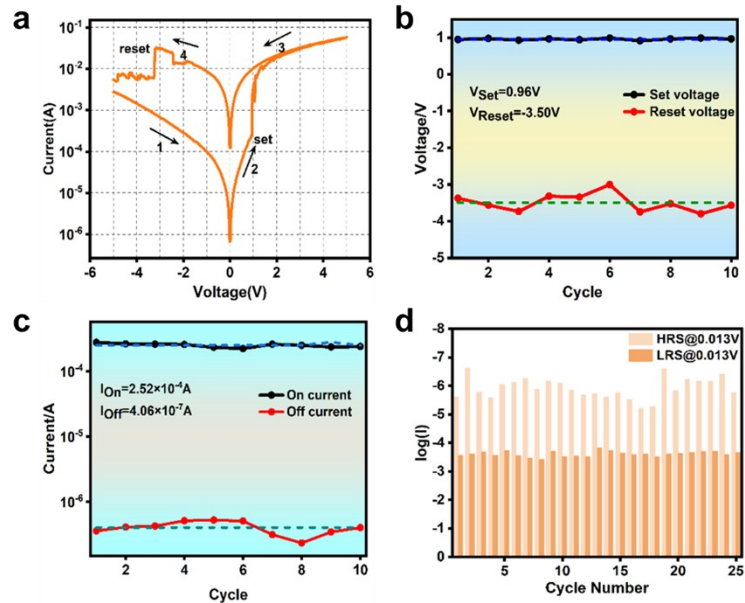

Fig. S5 Device stability of ITO/3/Ag at 240 °C: (a)  $I$ - $V$  curves; (b) the  $V_{Set}/V_{Reset}$  showing random 10 cycles; (c)  $I_{ON}$  and  $I_{OFF}$  showing random 10 cycles; (d) cycle endurance showing 25 cycles.

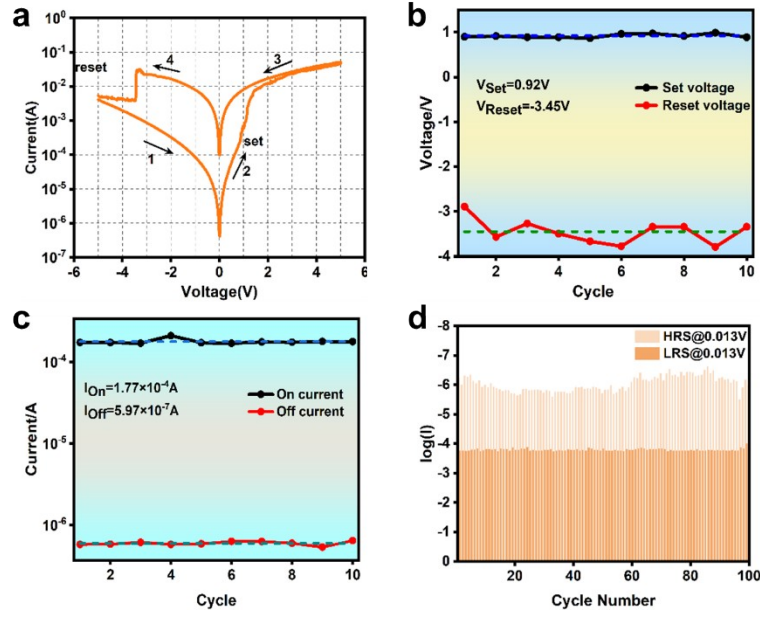

**Fig. S6** Device stability of ITO/3/Ag after one year: (a)  $I$ - $V$  curves showing four sweeping ranges; (b) the  $V_{Set}/V_{Reset}$  distribution with random 10 cycles; (c)  $I_{ON}$  and  $I_{OFF}$  showing random 10 cycles; (d) cycle endurance with 100 cycles.

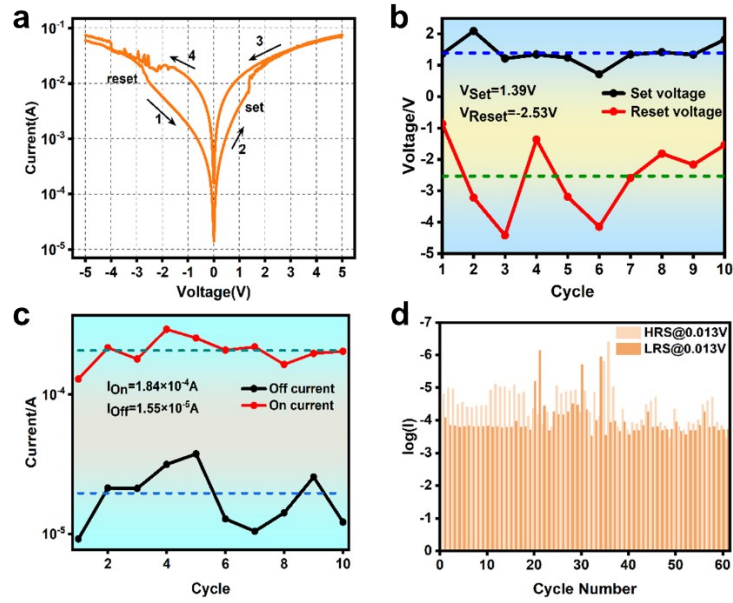

**Fig. S7** (a)  $I$ - $V$  curves of the ITO/1/Ag showing four sweeping processes; (b) the averaged  $V_{Set}/V_{Reset}$  calculated from 10 cycles; (c) the averaged HRS and LRS currents calculated from 10 cycles; (d) cycle endurance of the ITO/1/Ag device by showing 65 cycles.

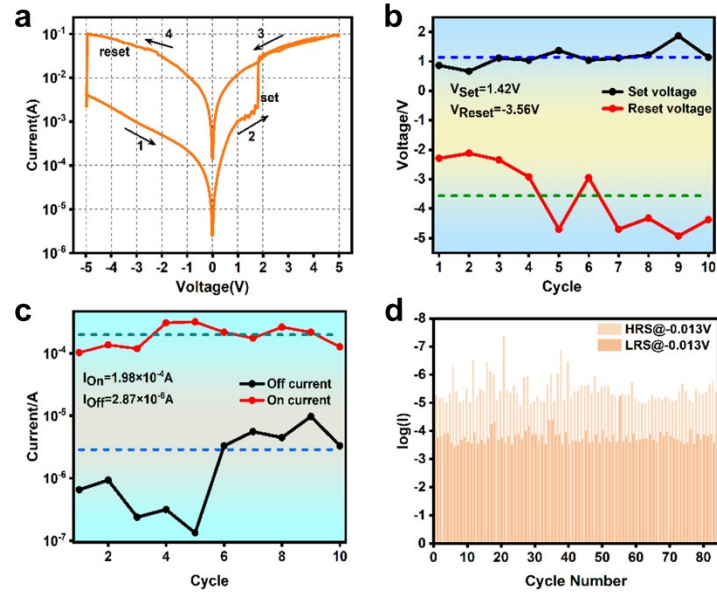

**Fig. S8** (a)  $I$ - $V$  curves of the ITO/2/Ag device showing four sweeping processes; (b) the averaged  $V_{Set}/V_{Reset}$  calculated from 10 cycles; (c) the averaged HRS and LRS currents calculated from 10 cycles; (d) cycle endurance of the ITO/2/Ag device showing 90 cycles.

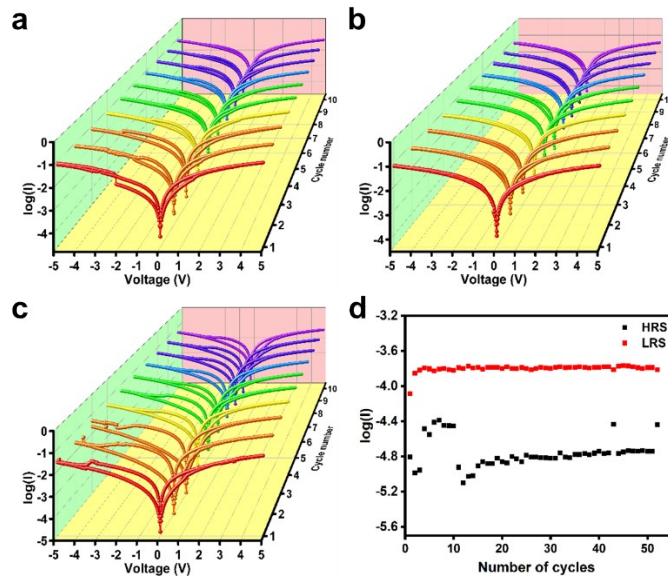

**Fig. S9** (a)  $I$ - $V$  curves of the ITO/MV·2I/Ag device with 10 cycles; (b)  $I$ - $V$  curves of the ITO/CuI/Ag device with 10 cycles; (c)  $I$ - $V$  curves of the ITO/MnMo<sub>6</sub>O<sub>18</sub>L<sub>2</sub>/Ag device with 10 cycles; (d) HRS and LRS of ITO/MnMo<sub>6</sub>O<sub>18</sub>L<sub>2</sub>/Ag device.

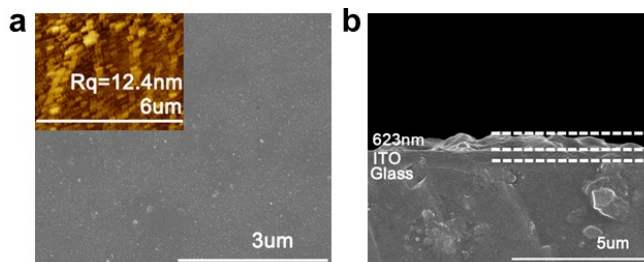

**Fig. S10** SEM image of ITO/MnMo<sub>6</sub>O<sub>18</sub>L<sub>2</sub>/Ag: (a) top-view SEM image (inserted: the surface AFM image); (b) the cross-sectional image showing the thickness

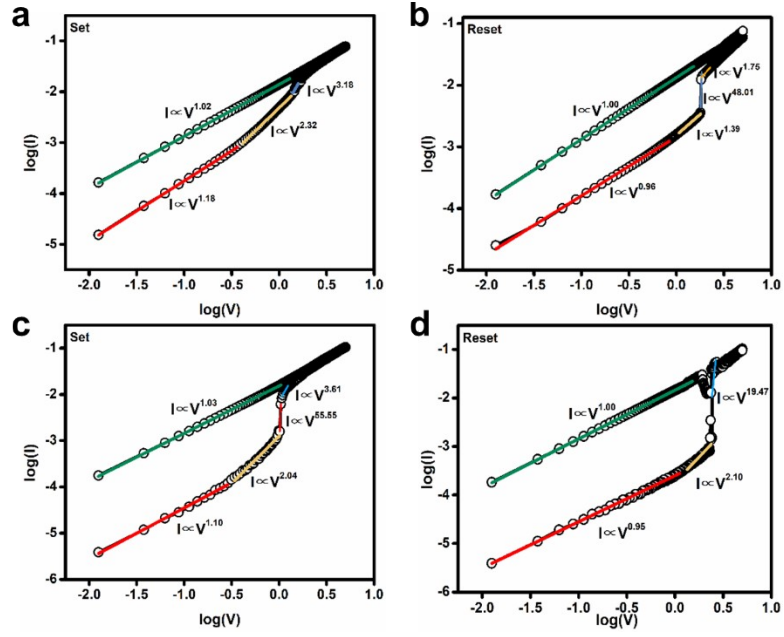

**Fig. S11** Log-log plots on the  $I$ - $V$  curves: (a) ITO/1/Ag during Set process; (b) ITO/1/Ag during Reset process; (c) ITO/2/Ag under during Set process; (d) ITO/2/Ag during Reset process.

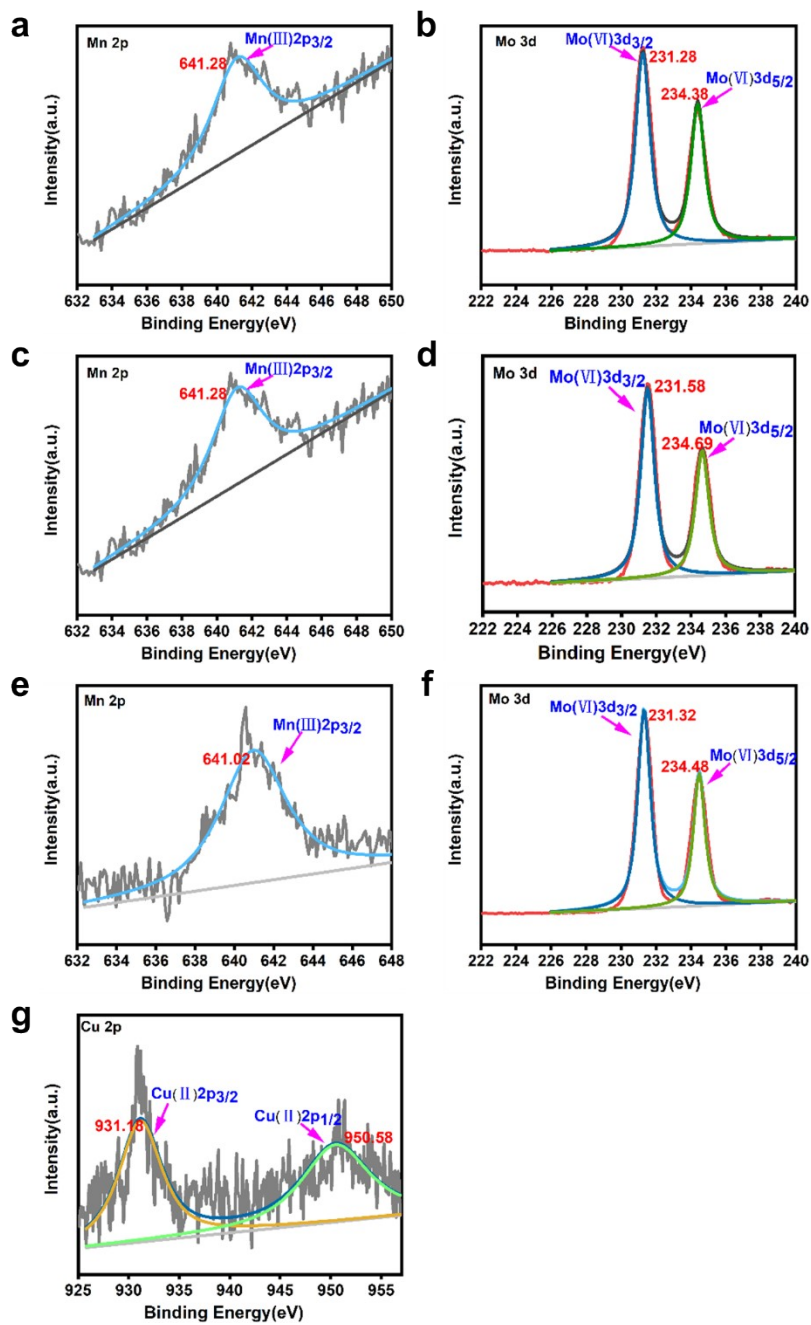

**Fig. S12** The XPS spectra: (a) Mn-2p and (b) Mo-3d for  $\text{MnMo}_6\text{O}_{18}\text{L}_2$ ; (c) Mn-2p and (d) Mo-3d for **1**; (e) Mn-2p and (f) Mo-3d for **2**; (g) Cu-2p for **2**.

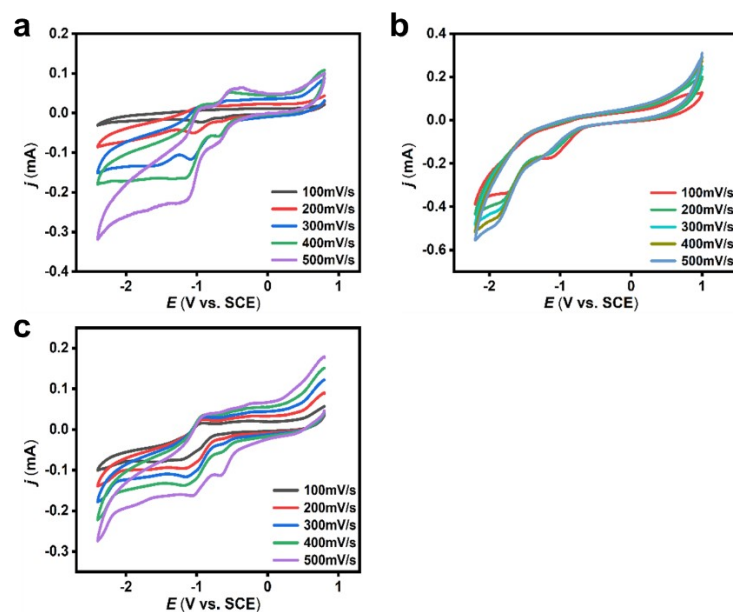

**Fig. S13** Cyclic voltammogram (CV) of three hybrids with different scanning rates: (a) **1**; (b) **2**; (c) **3**.

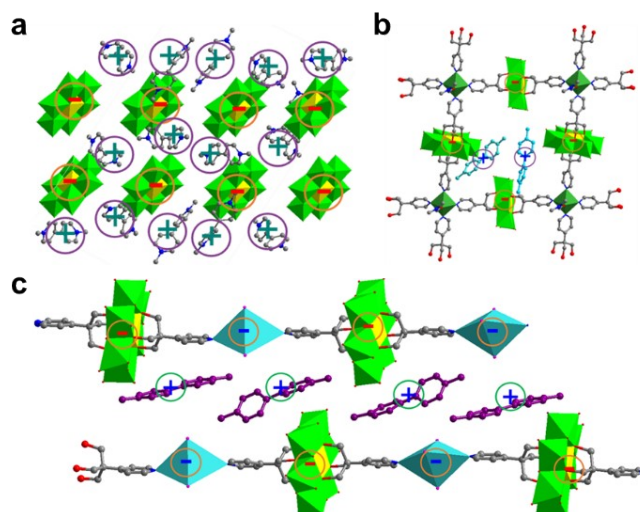

**Fig. S14** The packing diagram showing the positions of electron-rich POM/Cu<sub>2</sub>I<sub>3</sub> clusters and electron-poor MV<sup>2+</sup>: (a) **1**; (b) **2**; (c) **3**.

## References

- 1 X. Li, Y. Wang, R. Wang, C. Cui, C. Tian and G. Yang, *Angew. Chem. Int. Ed. Engl.* 2016, **55**, 6462–6466.
- 2 D. Menozzi, E. Biavardi, C. Massera, F. Schmidtchen, A. Cornia and E. Dalcanale, *Supramol. Chem.* 2010, **22**, 768–775
- 3 G. A. Sheldrick, A short history of SHELX, *Acta Crystallogr. Sect. A* 2008, **64**, 112–122.
- 4 A. Spek, Single-crystal structure validation with the program PLATON, *J. Appl. Crystallogr.* 2003, **36**, 7–13.
- 5 B. Chen, Y. Huang, K. Song, X. Lin, H. Li and Z. Chen, *Chem. Mater.* 2021, **33**, 2178–2186.
- 6 N. S. Sterin, B. Nivedita, C. Marc, M. N. Satyanarayan, S. M. Sib and P. D. Partha, *Phys. Status Solidi A*. 2020, **217**, 2000306.
- 7 X. Chen, P. Huang, X. Zhu, S. Zhuang, H. Zhu, J. Fu, A. Nissimagoudar, W. Li, X. Zhang, L. Zhou, Y. Wang, Z. Lv, Y. Zhou and S. Han, *Nanoscale Horiz.* 2019, **4**, 697–704.
- 8 B. Hu, C. Wang, J. Wang, J. Gao, K. Wang, J. Wu, G. Zhang, W. Cheng, B. Venkateswarlu, M. Wang, P. Lee and Q. Zhang, *Chem. Sci.* 2014, **5**, 3404–3408.

9 Y. Huang, X. Lin, B. Chen, H. Zheng, Z. Chen, H. Li and S. Zheng, *Angew Chem. Int. Ed. Engl.* 2021, **60**, 16911–16916.
